# Supplementary material
Source: MDPI journal article supplement (https://www.mdpi.com/2073-4395/14/3/594)
Supplement: s1 [file s1]

# Crop Conversion from Annual to Perennials: An Effective Strategy to Affect Soil Multifunctionality

Panpan Liu <sup>1,2</sup>, Dong Wang <sup>1,\*</sup>, Yue Li <sup>3</sup>, Ji Liu <sup>2</sup>, Yongxing Cui <sup>4</sup>, Guopeng Liang <sup>5</sup>, Chaoqun Wang <sup>6,7</sup>, Chao Wang <sup>8</sup>, Daryl L. Moorhead <sup>9</sup> and Ji Chen <sup>2,10,\*</sup>

<sup>1</sup> International Joint Research Laboratory of Global Change Ecology, School of Life Sciences, Henan University, Kaifeng 475004, China

<sup>2</sup> State Key Laboratory of Loess and Quaternary Geology, Institute of Earth Environment, Chinese Academy of Sciences, Xi'an 710061, China

<sup>3</sup> College of Ecology, Lanzhou University, Lanzhou 730000, China

<sup>4</sup> Institute of Biology, Freie Universität Berlin, 14195 Berlin, Germany

<sup>5</sup> Department of Forest Resources, University of Minnesota, Saint Paul, MN 55108, USA

<sup>6</sup> Biogeochemistry of Agroecosystems, University of Göttingen, 37077 Göttingen, Germany

<sup>7</sup> Faculty of Land and Food Systems, University of British Columbia, Vancouver, BC V6S0K4, Canada

<sup>8</sup> School of Ecology and Environment, Northwestern Polytechnical University, Xi'an 710072, China

<sup>9</sup> Department of Environmental Sciences, University of Toledo, Toledo, OH 43606, USA

<sup>10</sup> Department of Agroecology, Aarhus University, 8830 Tjele, Denmark

\* Correspondence: wangdong19882005@163.com (D.W.); ji.chen@agro.au.dk (J.C.)

## Supplementary Tables S1 to S3

Table S1

Linear mixed-effects model of crop type, soil depth and their interactive effects on soil physical, chemical, and microbial properties.

| Data                             | Treatment              | numDF | denDF | F-value  | p-value       |
|----------------------------------|------------------------|-------|-------|----------|---------------|
| Soil water content               | Intercept              | 1     | 21    | 824.04   | < <b>0.01</b> |
|                                  | Crop type              | 3     | 21    | 6.01     | < <b>0.01</b> |
|                                  | Soil depth             | 1     | 21    | 1.54     | 0.23          |
|                                  | Crop type × Soil depth | 3     | 21    | 0.92     | 0.45          |
| Bulk density                     | Intercept              | 1     | 21    | 3750.62  | < <b>0.01</b> |
|                                  | Crop type              | 3     | 21    | 5.13     | < <b>0.01</b> |
|                                  | Soil depth             | 1     | 21    | 11.26    | < <b>0.01</b> |
|                                  | Crop type × Soil depth | 3     | 21    | 0.08     | 0.97          |
| Soil pH                          | Intercept              | 1     | 21    | 32141.97 | < <b>0.01</b> |
|                                  | Crop type              | 3     | 21    | 16.45    | < <b>0.01</b> |
|                                  | Soil depth             | 1     | 21    | 0.01     | 0.93          |
|                                  | Crop type × Soil depth | 3     | 21    | 0.28     | 0.84          |
| Dissolved organic carbon content | Intercept              | 1     | 21    | 560.38   | < <b>0.01</b> |
|                                  | Crop type              | 3     | 21    | 26.69    | < <b>0.01</b> |
|                                  | Soil depth             | 1     | 21    | 0.29     | 0.60          |
|                                  | Crop type × Soil depth | 3     | 21    | 3.19     | <b>0.04</b>   |
| Microbial biomass carbon         | Intercept              | 1     | 21    | 719.94   | < <b>0.01</b> |
|                                  | Crop type              | 3     | 21    | 24.57    | < <b>0.01</b> |
|                                  | Soil depth             | 1     | 21    | 0.29     | 0.60          |
|                                  | Crop type × Soil depth | 3     | 21    | 4.71     | <b>0.01</b>   |
| Microbial biomass nitrogen       | Intercept              | 1     | 21    | 467.23   | < <b>0.01</b> |
|                                  | Crop type              | 3     | 21    | 8.02     | < <b>0.01</b> |
|                                  | Soil depth             | 1     | 21    | 0.25     | 0.62          |
|                                  | Crop type × Soil depth | 3     | 21    | 4.55     | <b>0.01</b>   |

numDF, numerator degree of freedom. denDF, denominator degree of freedom. Linear mixed-effects models were conducted, crop type, soil depth and their interaction (crop type × soil depth) were considered as fixed factors, while plots nested within blocks were considered as random factors.

Table S2

Linear mixed-effects model of crop type, soil depth and their interactive effects on soil extracellular enzymatic activities.

| Data                                                      | Treatment                     | numDF | denDF | F-value | p-value       |
|-----------------------------------------------------------|-------------------------------|-------|-------|---------|---------------|
| Carbon acquisition extracellular enzymatic activities     | Intercept                     | 1     | 21    | 1627.29 | < <b>0.01</b> |
|                                                           | Crop type                     | 3     | 21    | 69.85   | < <b>0.01</b> |
|                                                           | Soil depth                    | 1     | 21    | 193.14  | < <b>0.01</b> |
|                                                           | Crop type $\times$ Soil depth | 3     | 21    | 47.79   | < <b>0.01</b> |
| Nitrogen acquisition extracellular enzymatic activities   | Intercept                     | 1     | 21    | 1996.14 | < <b>0.01</b> |
|                                                           | Crop type                     | 3     | 21    | 97.99   | < <b>0.01</b> |
|                                                           | Soil depth                    | 1     | 21    | 3.62    | 0.07          |
|                                                           | Crop type $\times$ Soil depth | 3     | 21    | 56.99   | < <b>0.01</b> |
| Phosphorus acquisition extracellular enzymatic activities | Intercept                     | 1     | 21    | 757.58  | < <b>0.01</b> |
|                                                           | Crop type                     | 3     | 21    | 72.67   | < <b>0.01</b> |
|                                                           | Soil depth                    | 1     | 21    | 559.36  | < <b>0.01</b> |
|                                                           | Crop type $\times$ Soil depth | 3     | 21    | 52.23   | < <b>0.01</b> |

Table S3

Linear mixed-effects model of crop type, soil depth and their interactive effects on soil multifunctionality.

| Data                                | Treatment                     | numDF | denDF | F-value | p-value       |
|-------------------------------------|-------------------------------|-------|-------|---------|---------------|
| Soil multifunctionality             | Intercept                     | 1     | 21    | 0.00    | 1.00          |
|                                     | Crop type                     | 3     | 21    | 26.12   | < <b>0.01</b> |
|                                     | Soil depth                    | 1     | 21    | 112.08  | < <b>0.01</b> |
|                                     | Crop type $\times$ Soil depth | 3     | 21    | 6.45    | < <b>0.01</b> |
| Water regulation                    | Intercept                     | 1     | 21    | 0.27    | 0.61          |
|                                     | Crop type                     | 3     | 21    | 0.71    | 0.56          |
|                                     | Soil depth                    | 1     | 21    | 6.86    | <b>0.02</b>   |
|                                     | Crop type $\times$ Soil depth | 3     | 21    | 4.36    | <b>0.02</b>   |
| Carbon cycle multifunctionality     | Intercept                     | 1     | 21    | 0.00    | 1.00          |
|                                     | Crop type                     | 3     | 21    | 165.29  | < <b>0.01</b> |
|                                     | Soil depth                    | 1     | 21    | 458.14  | < <b>0.01</b> |
|                                     | Crop type $\times$ Soil depth | 3     | 21    | 104.34  | < <b>0.01</b> |
| Nitrogen cycle multifunctionality   | Intercept                     | 1     | 21    | 0.00    | 1.00          |
|                                     | Crop type                     | 3     | 21    | 33.38   | < <b>0.01</b> |
|                                     | Soil depth                    | 1     | 21    | 0.90    | 0.35          |
|                                     | Crop type $\times$ Soil depth | 3     | 21    | 18.55   | < <b>0.01</b> |
| Phosphorus cycle multifunctionality | Intercept                     | 1     | 21    | 0.00    | 1.0000        |
|                                     | Crop type                     | 3     | 21    | 64.17   | < <b>0.01</b> |
|                                     | Soil depth                    | 1     | 21    | 493.94  | < <b>0.01</b> |
|                                     | Crop type $\times$ Soil depth | 3     | 21    | 46.12   | < <b>0.01</b> |
